# Supplementary material for: Modeling memory in gravel-bed rivers: a flow-history-dependent relation for evolving thresholds of motion
Source: Copernicus journal article supplement (doi:10.5194/esurf-13-593-2025), 2025-07-22
Supplement: Supplementary file 1 [file esurf-13-593-2025-supplement.pdf]

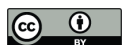

*Supplement of*

## **Modeling memory in gravel-bed rivers: a flow-history-dependent relation for evolving thresholds of motion**

**Claire C. Masteller et al.**

*Correspondence to:* Claire C. Masteller (cmasteller@wustl.edu)

The copyright of individual parts of the supplement might differ from the article licence.

## Introduction

We provide one supplementary figures to illustrate model performance (Fig. S1).

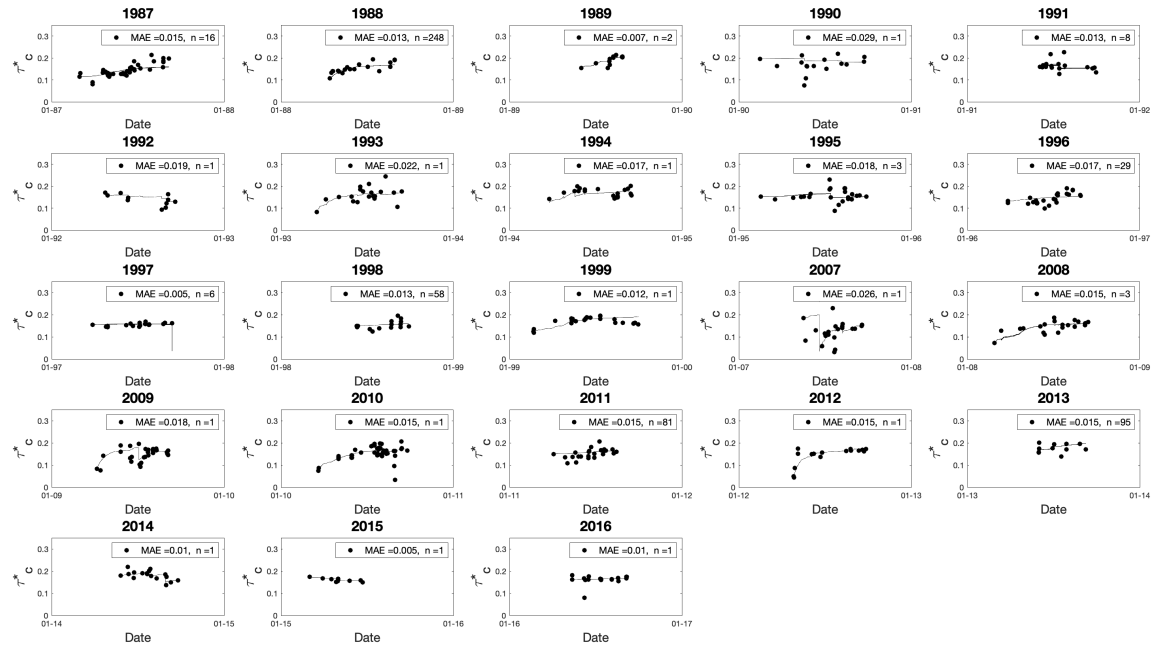

**Figure S1.** Best-fit model runs for every year on the record. “n” gives the number of models (i.e., parameter combinations) that minimize MAE and provide an equivalent best fit to the data. Annual best-fit parameters are also specified.
